# Supplementary material
Source: publisher figshare collection journal article supplement (https://springernature.figshare.com/ndownloader/files/20836317)
Supplement: Supplementary file [file 20836317]

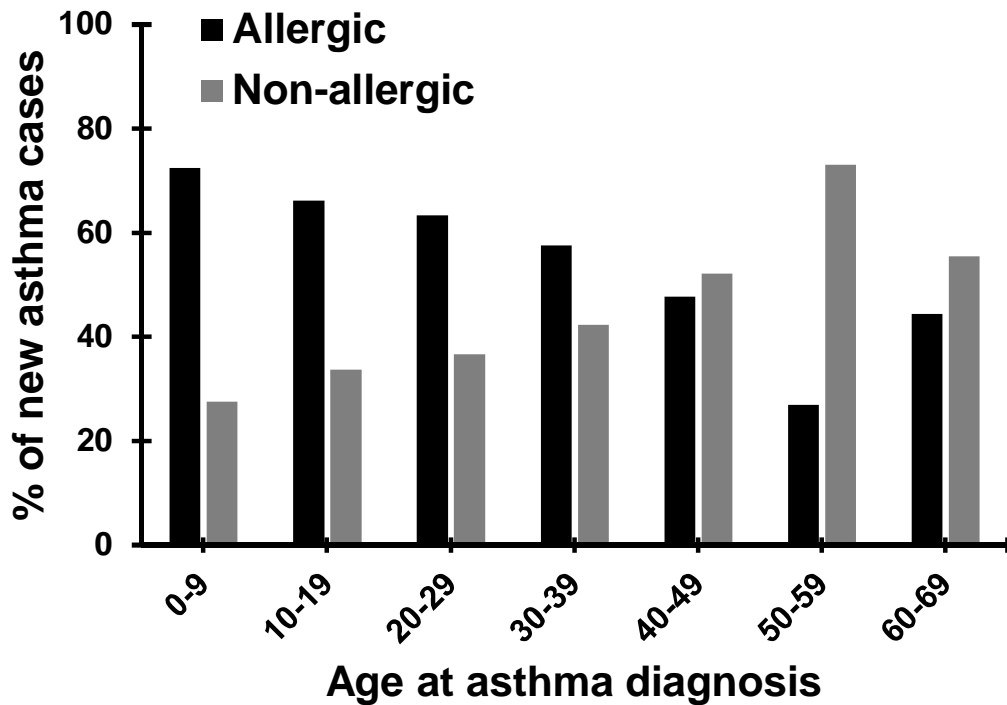

Supplementary Figure 1
